# Supplementary material for: Exploring optimization parameters to increase ssDNA recombineering in Lactococcus lactis and Lactobacillus reuteri
Source: PubMed Central journal article supplement — Bioengineered. 2012 Jul 1;3(4):209–17. doi: 10.4161/bioe.21049 (PMC3476877; doi:10.4161/bioe.21049), 2012-07-01
Supplement: bbug-3-209-s01.pdf [file bbug-3-209-s01.pdf]

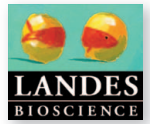

## **Supplemental Material to:**

**Jan-Peter van Pijkeren, Kar Mun Neoh, Denise Sirias,  
Anthony Findley and Robert A. Britton**

**Exploring optimization parameters to increase ssDNA  
recombineering in *Lactococcus lactis* and *Lactobacillus  
reuteri***

**Bioengineered 2012; 3(4)**

**<http://dx.doi.org/10.4161/bioe.21049>**

**<http://www.landesbioscience.com/journals/bioe/article/21049/>**

**Supplementary Table 1: Bacterial strains and plasmids used in this study**

| Strain or plasmid                              | Characteristics <sup>†</sup>                                                                                                                 | Source <sup>*</sup> |
|------------------------------------------------|----------------------------------------------------------------------------------------------------------------------------------------------|---------------------|
| <i>strains</i>                                 |                                                                                                                                              |                     |
| <i>L. reuteri</i> ATCC PTA 6475                | human breast milk isolate                                                                                                                    | Biogaia             |
| <i>L. lactis</i> subsp. <i>cremoris</i> NZ9000 | Derivative of MG1363, <i>pepN::nisRK</i>                                                                                                     | 1                   |
| <i>L. lactis</i> subsp. <i>cremoris</i> NZ9700 | Nisin-producing strain                                                                                                                       | 1                   |
| <i>L. casei</i> BL23                           | Human faecal isolate                                                                                                                         | 2                   |
| <i>L. plantarum</i> BAA-793                    | Human oral isolate                                                                                                                           | 3                   |
| <i>E. coli</i> DH5α                            |                                                                                                                                              | Invitrogen          |
| <i>E. coli</i> SIMD44                          | <i>E. coli</i> derivative of HME6 [1 (int-cIII)< >EF2132*]                                                                                   | 4                   |
| RPRB3007                                       | Derivative of <i>L. reuteri</i> ATCC PTA 6475 in which CRE region upstream of <i>pdu</i> operon has been modified by incorporation of oJP675 |                     |
| <i>plasmids</i>                                |                                                                                                                                              |                     |
| pJP005                                         | Derivative of pNZ8048, cloned <i>recT1</i> under control of nisin-inducible promoter                                                         | 5                   |
| pSIP411                                        | Em <sup>R</sup> , Sakacin-P based expression vector                                                                                          | 6                   |
| pJP042                                         | Derivative of pSIP411, replaced <i>gusA</i> with <i>recT1</i> derived from <i>L. reuteri</i> ATCC PTA 6475                                   | 5                   |
| pJP043                                         | Derivative of pSIP411, replaced <i>gusA</i> with <i>recT</i> derived <i>E. faecalis</i> CRMEN 19 (amplified from <i>E. coli</i> SIMD44)      | This work           |
| pJP045                                         | Derivative of pSIP411, replaced <i>gusA</i> with <i>recT</i> derived from <i>L. casei</i> BL23 (accession number YP_001986912)               | This work           |
| pJP046                                         | Derivative of pSIP411, replaced <i>gusA</i> with <i>recT2</i> derived from <i>L. casei</i> BL23 (accession number YP_001987247)              | This work           |
| pJP052                                         | Derivative of pSIP411, replaced <i>gusA</i> with <i>recT</i> derived from <i>L. plantarum</i> BAA-793 (accession number YP_004888633 )       | This work           |

<sup>†</sup>: CRE: Catabolite Repression Element; Em<sup>R</sup>: erythromycin resistant

**Supplementary Table 2: oligonucleotides used in this study**

| oligo name <sup>§</sup> | sequence (5'-3') <sup>†</sup>                                                                     | Target/comment <sup>#</sup>                                                          |
|-------------------------|---------------------------------------------------------------------------------------------------|--------------------------------------------------------------------------------------|
| <i>PCR</i>              |                                                                                                   |                                                                                      |
| oJP161.1                | <i>agcagctctagatcagaaaaggtaaggccgctc</i>                                                          | Rev oligo starting at stop codon <i>recT</i> gene <i>E. faecalis</i> CRMEN 19        |
| oJP367                  | caatgatctagactcgaggaaatcggtacc                                                                    | fwd oligo internal to XbaI site in pSIP411                                           |
| oJP368                  | ttctacaggacgtaccatggctaaaatc                                                                      | rev oligo internal to NcoI site in pSIP411                                           |
| oJP371                  | catggctaaaatctccttgaatag                                                                          | rev oligo starting at translational start site (ATG) located in NcoI site in pSIP411 |
| oJP373                  | <i>agcagcccatggggaatgaattaatagtaagcgttc</i>                                                       | fwd oligo starting <i>recT</i> gene <i>E. faecalis</i> CRMEN 19                      |
| oJP409_PHO              | gcgacaacatctttgcaaaaacaattaacg                                                                    | fwd oligo starting at second codon <i>recT L. casei</i> BL23                         |
| oJP410_PHO              | ctacttatctacgctgtcgtcgc                                                                           | rev oligo starting at stop codon <i>recT L. casei</i> BL23                           |
| oJP411_PHO              | acgacacaatatgacctaaaaaaatgccag                                                                    | fwd oligo starting at second codon <i>recT L. casei</i> BL23                         |
| oJP412_PHO              | ttatccttgtgaccgcaagattctg                                                                         | rev oligo starting at stop codon <i>recT L. casei</i> BL23                           |
| oJP413_PHO              | agtaatgagctagtacgatggttaataac                                                                     | fwd oligo starting at second codon <i>recT L. plantarum</i> BAA-793                  |
| oJP414_PHO              | ttagctggcgtcaaatctcgc                                                                             | rev oligo starting at stop codon <i>recT L. plantarum</i> BAA-793                    |
| oJP415                  | agcatatatgtattctataaaatactattacaaggag                                                             | fwd oligo pSIP411 located upstream of MCS                                            |
| oJP416                  | ttatcaactgctgcttttgctatcaatc                                                                      | rev oligo pSIP411 located downstream of MCS                                          |
| oJP673                  | taagacagctatgcagtcattgg                                                                           | fwd oligo located upstream of CRE locus <i>pdu</i> operon                            |
| oJP674                  | tatctaatagttggatcaactctgc                                                                         | rev oligo located downstream of CRE locus <i>pdu</i> operon                          |
| <i>Recombineering</i>   |                                                                                                   |                                                                                      |
| oJP563                  | gagataccaccaggtcctaaggcagagaacgacgtttgtTGCTAagctcagacaaaggattatgttgctcataaattgt                   | <i>rpoB L. lactis</i>                                                                |
| oJP577                  | tcaaacaccaggaccaagcgtgaaagacgacgctTCTGCTtaattcacctaatgggtggttgatccatgaactgg                       | <i>rpoB L. reuteri</i>                                                               |
| oJP610                  | ccagttcatggatcaaaaccaaccattaggtgaattaaGCAGAAagcgtcgtcttcagcgtgctgctggtggtttga                     | leading strand <i>rpoB L. reuteri</i>                                                |
| oJP675                  | gcctcctaagtataaaaaacaatagcgataatgagaaatcgGAATTCatttgggtacatgttaattttataacatgatatt                 | CRE locus <i>pdu</i> operon <i>L. reuteri</i>                                        |
| oJP1147                 | <i>g*a*g*a*t*accaccaggtcctaaggcagagaacgacgtttgtTGCTAagctcagacaaaggattatgttgctcataaattgt</i>       | <i>rpoB L. lactis</i>                                                                |
| oJP1148                 | <i>gagataccaccaggtcctaaggcagagaacgacgtttgtTGCTAagctcagacaaaggattatgttgctcataa*a*t*t*g*t</i>       | <i>rpoB L. lactis</i>                                                                |
| oJP1149                 | <i>g*a*g*a*t*accaccaggtcctaaggcagagaacgacgtttgtTGCTAagctcagacaaaggattatgttgctcata*a*a*t*t*g*t</i> | <i>rpoB L. lactis</i>                                                                |
| oJP1157                 | acaattatggaccaacataatcttctgctgacttAGCAacaacgctgttctctgcttaggacctggtgctatctc                       | leading strand <i>rpoB L. lactis</i>                                                 |
| oJP1158                 | t*c*a*a*a*ccaccaggaccaagcgtgaaagacgacgctTCTGCTtaattcacctaatgggtggttgatccatgaactgg                 | <i>rpoB L. reuteri</i>                                                               |
| oJP1159                 | tcaaacaccaggaccaagcgtgaaagacgacgctTCTGCTtaattcacctaatgggtggttgatccatga*a*c*t*g*g                  | <i>rpoB L. reuteri</i>                                                               |
| oJP1160                 | t*c*a*a*a*ccaccaggaccaagcgtgaaagacgacgctTCTGCTtaattcacctaatgggtggttgatccatga*a*c*t*g*g            | <i>rpoB L. reuteri</i>                                                               |

§: \_PHO indicates oligonucleotides has phosphate group attached to the 5'-end of the oligonucleotide;

†: Italic sequence represents clamp; underlined sequence indicates restriction site; sequence in uppercase are the sequence changes for the recombineering oligonucleotide; \* indicates phosphorothioate linkage. With exception of oJP610 and oJP1157 are all recombineering oligonucleotides identical to the lagging strand of DNA replication. Upper case bases represent non-complementary bases.

#: *rpoB* DNA-directed RNA polymerase (locus tag HMPREF0536\_0828 for *L. reuteri*, LLNZ\_10235 for *L. lactis*). The locus tags listed can be found on <http://img.jgi.doe.gov/cgi-bin/w/main.cgi>; Fwd: forward; Rev: reverse; MCS: multiple cloning site; CRE: catabolite repression element. The accession numbers for each of the *recT* genes are listed in the Materials and Methods.

## REFERENCES

1. Kuipers OP, Beerthuyzen MM, Siezen RJ, de Vos WM. Characterization of the nisin gene cluster nisABTCIPR of *Lactococcus lactis*. Requirement of expression of the nisA and nisI genes for development of immunity. Eur J Biochem 1993; 216:281–291.
2. Mazé A, Boël G, Zúñiga M, Bourand A, Loux V, Yebra MJ, Monedero V, Correia K, Jacques N, Beaufils S, Poncet S, Joyet P, Milohanic E, Casarégola S, Auffray Y, Pérez-Martínez G, Gibrat J-F, Zagorec M, Francke C, Hartke A, Deutscher J. Complete genome sequence of the probiotic *Lactobacillus casei* strain BL23. Journal of Bacteriology 2010; 192:2647–2648.
3. Kleerebezem M, Boekhorst J, van Kranenburg R, Molenaar D, Kuipers OP, Leer R, Turchini R, Peters SA, Sandbrink HM, Fiers MWEJ, Stiekema W, Lankhorst RMK, Bron PA, Hoffer SM, Groot MNN, Kerkhoven R, de Vries M, Ursing B, de Vos WM, Siezen RJ. Complete genome sequence of *Lactobacillus plantarum* WCFS1. Proc Natl Acad Sci USA 2003; 100:1990–1995.
4. Datta S, Costantino N, Zhou X, Court DL. Identification and analysis of recombineering functions from Gram-negative and Gram-positive bacteria and their phages. Proc Natl Acad Sci USA 2008; 105:1626–1631.
5. van Pijkeren J-P, Britton RA. High efficiency recombineering in lactic acid bacteria. Nucleic Acids Research 2012; 40:e76
6. Sørvig E, Mathiesen G, Naterstad K, Eijsink VGH, Axelsson L. High-level, inducible gene expression in *Lactobacillus sakei* and *Lactobacillus plantarum* using versatile expression vectors. Microbiology (Reading, Engl) 2005; 151:2439–2449.
